# Supplementary material for: MicroRNA-375 plays a dual role in prostate carcinogenesis
Source: PubMed Central journal article supplement (PMC4431534; doi:10.1186/s13148-015-0076-2), 2015-04-10
Supplement: 13148_2015_76_MOESM5_ESM.pdf [file 13148_2015_76_MOESM5_ESM.pdf]

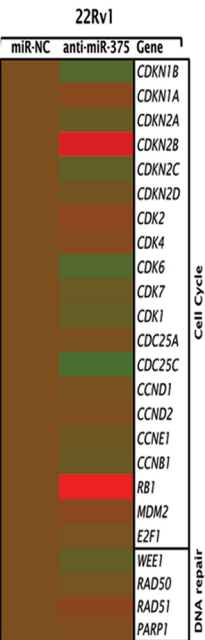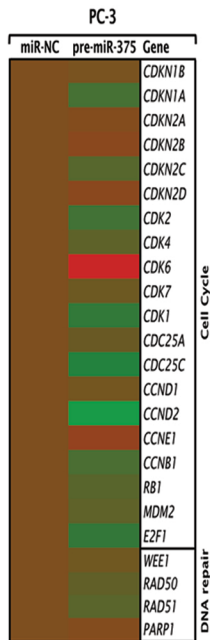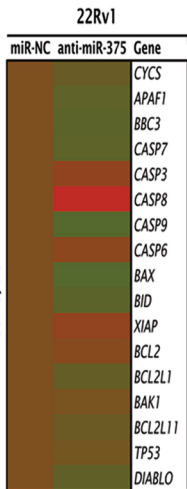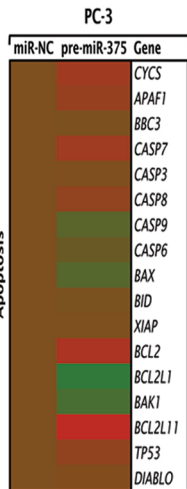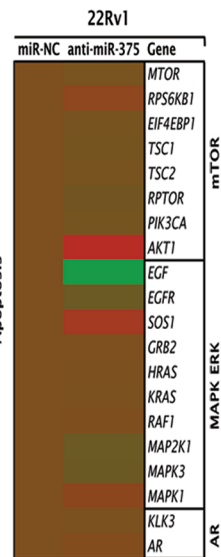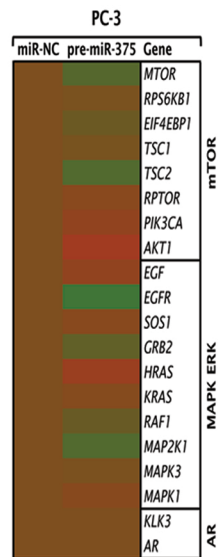

Expression levels

lower

higher
